# Supplementary material for: Research on advanced photoresponsive azobenzene hydrogels with push–pull electronic effects: a breakthrough in photoswitchable adhesive technologies
Source: Royal Society of Chemistry journal article supplement (doi:10.1039/d4mh01047g), 2024-10-25
Supplement: d4mh01047g1.pdf [file d4mh01047g1.pdf]

## **Supporting Information**

# **Research on Advanced Photoresponsive Azobenzene Hydrogels with Push-Pull Electronic Effects: A Breakthrough in Photoswitchable Adhesive Technologies**

Yun-Ying Wang, Peng-Wen Chen, Yu-Hsin Chen, Mei-Yu Yeh\*

Department of Chemistry, Chung Yuan Christian University, No. 200, Zhongbei Rd., Zhongli Dist.,  
Taoyuan City 320314, Taiwan, Republic of China.

\*Corresponding author. E-mail: myyeh@cycu.edu.tw

|                                                                             |     |
|-----------------------------------------------------------------------------|-----|
| Scheme S1 Synthetic route for the monomers.....                             | S3  |
| Synthesis of compounds.....                                                 | S3  |
| Biocompatibility of ionic hydrogels.....                                    | S5  |
| Porcine skin.....                                                           | S5  |
| Table S1 Formulations of azobenzene-based hydrogels.....                    | S6  |
| Fig. S1 Rheology measurement.....                                           | S6  |
| Fig. S2 Cell viability.....                                                 | S7  |
| Fig. S3 Lap-shear strength tests.....                                       | S7  |
| Table S2 Lap-shear strength tests.....                                      | S8  |
| Table S3 Comparison of reported adhesive strength values of hydrogels.....  | S8  |
| Fig. S4 Adhesive strength change.....                                       | S9  |
| Fig. S5 and S6 Molecular orbitals.....                                      | S9  |
| Table S4 Summarized the bond lengths, bond angles, and dihedral angles..... | S11 |
| Fig. S7 The stretchability of the healed hydrogel.....                      | S12 |
| Fig. S8-S13 <sup>1</sup> H NMR spectra.....                                 | S12 |
| Fig. S14-16 HRMS spectra.....                                               | S15 |
| Reference.....                                                              | S17 |

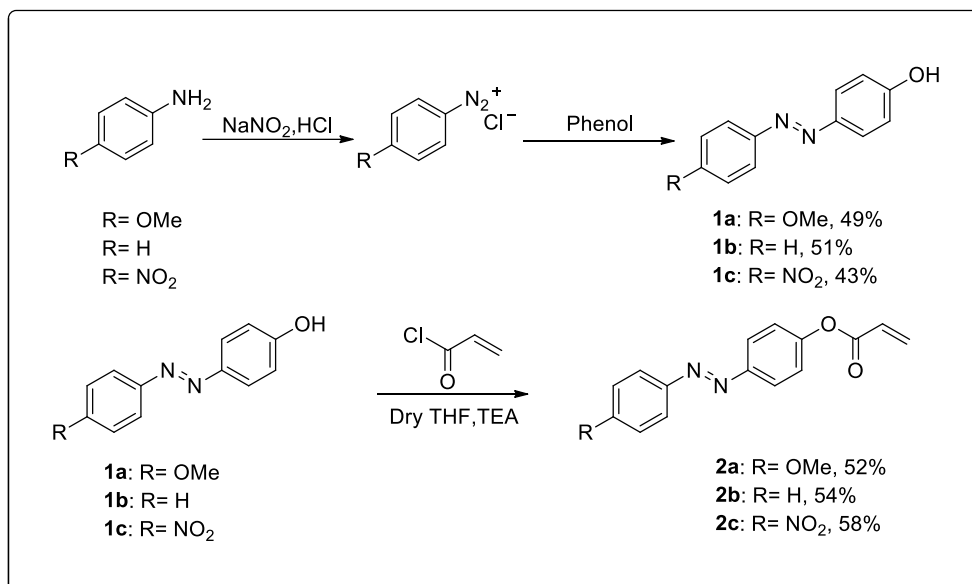

Scheme S1. Synthetic route for the monomers of ABOMe, ABH, and ABNO<sub>2</sub>.

#### Synthesis of (*E*)-4-((4-methoxyphenyl)diazenyl)phenol (**1a**)

Dissolve *p*-anisidine (1.00 mL, 8.12 mmol) in a mixture of concentrated hydrochloric acid (2.00 mL, 64.66 mmol) and water (20 mL). Cool the solution to 5°C, then add dropwise an aqueous solution of sodium nitrite (0.80 g, 11.62 mmol) in 20 mL of water. Stir the reaction mixture at 5°C for 45 minutes, then add 2.5 mL of 1.0 M aqueous sodium hydroxide solution and phenol (1.112 g, 10.98 mmol). After stirring for 60 minutes, filter the precipitate, wash it with cold water, and dry it under vacuum to obtain an orange solid of **1a** (0.91 g, 49%). <sup>1</sup>H NMR (400 MHz, DMSO-*d*<sub>6</sub>): δ = 7.81 (d, *J* = 9.2 Hz, 2H), 7.75 (d, *J* = 9.2 Hz, 2H), 7.10 (d, *J* = 9.2 Hz, 2H), 6.93 (d, *J* = 9.2 Hz, 2H).

#### Synthesis of (*E*)-4-(phenyldiazenyl)phenol (**1b**)

In a manner similar to that described above, a mixture of aniline (2.00 mL, 21.94 mmol), hydrochloric acid (2.00 mL, 64.66 mmol), sodium nitrite (1.60 g, 23.24 mmol) and phenol (2.22 g, 23.64 mmol) were converted to **1b** as an orange solid (2.19 g, 51%). <sup>1</sup>H NMR (400 MHz, CDCl<sub>3</sub>): δ = 7.83-7.80 (m, 4H), 7.55-7.59 (m, 2H), 7.50-7.52 (m, 1H), 6.95 (d, *J* = 8.8 Hz, 2H)

### Synthesis of (*E*)-4-((4-nitrophenyl)diazenyl)phenol (**1c**)

In a manner similar to that described above, a mixture of *p*-nitroaniline (2.00 g, 14.48 mmol), hydrochloric acid (2.00 mL, 64.66 mmol), sodium nitrite (1.60 g, 23.24 mmol) and phenol (2.22 g, 23.64 mmol) were converted to **1c** as an orange solid (1.48 g, 43%). <sup>1</sup>H NMR (400 MHz, DMSO-*d*<sub>6</sub>): δ = 8.40 (d, *J* = 8.8 Hz, 2H), 8.00 (d, *J* = 8.8 Hz, 2H), 7.89 (d, *J* = 8.8 Hz, 2H), 6.99 (d, *J* = 8.8 Hz, 2H).

### Synthesis of 4-methoxyazobenzene acrylate (ABOMe monomer, **2a**)

In a 100 mL two-neck round-bottom flask, dissolve compound **1a** (1.00 g, 4.39 mmol) in 12 mL of anhydrous tetrahydrofuran and 0.5 mL of triethylamine under a nitrogen atmosphere. After reacting for 30 minutes, acryloyl chloride (1.5 mL, 16.57 mmol) was added at 5°C, and the reaction mixture was continued for 24 hours. Add water and extract the mixture with dichloromethane, then collect the organic layer, concentrate it under reduced pressure, and dry it under vacuum. Purify the resulting material by column chromatography to obtain a yellow solid product of **2a** (0.59 g, 52%). <sup>1</sup>H NMR (400 MHz, DMSO-*d*<sub>6</sub>): δ = 7.90-7.87 (m, 4H), 7.38 (d, *J* = 8.9 Hz, 2H), 7.12 (d, *J* = 8.9 Hz, 2H), 6.59-6.54 (m, 1H), 6.46-6.39 (m, 1H), 6.19-6.16 (m, 1H), 3.87 (s, 3H). <sup>13</sup>C NMR (100 MHz, DMSO-*d*<sub>6</sub>): δ = 164.40, 162.56, 152.35, 150.21, 146.55, 134.43, 127.92, 125.10, 123.91, 123.18, 115.06, 56.09. HRMS (ESI<sup>+</sup>) *m/z* for C<sub>16</sub>H<sub>14</sub>N<sub>2</sub>NaO<sub>3</sub> [M+Na]<sup>+</sup>, calcd 305.0902, found 305.0898.

### Synthesis of azobenzene acrylate (ABH monomer, **2b**)

In a manner similar to that described above, a reaction mixture of **1b** (1.00 g, 5.05 mmol) and acryloyl chloride (1.5 mL, 16.57 mmol) were converted to **2b** as an orange solid (0.69 g, 54%). <sup>1</sup>H NMR (400 MHz, DMSO-*d*<sub>6</sub>): δ = 7.96 (d, *J* = 8.8 Hz, 2H), 7.90-7.87 (m, 2H), 7.59 (d, *J* = 7.8 Hz, 3H), 7.42 (d, *J* = 8.8 Hz, 2H), 6.60-6.55 (m, 1H), 6.47-6.40 (m, 1H), 6.20-6.17 (m, 1H). <sup>13</sup>C NMR (100 MHz, DMSO-*d*<sub>6</sub>): δ = 164.37, 152.93, 152.30, 150.10, 134.60, 132.12, 129.98, 127.90, 124.32, 123.37, 123.05. HRMS (ESI<sup>+</sup>) *m/z* for C<sub>15</sub>H<sub>12</sub>N<sub>2</sub>NaO<sub>2</sub> [M+Na]<sup>+</sup>, calcd 275.0796, found 275.0795.

### Synthesis of 4-nitroazobenzene acrylate (ABNO<sub>2</sub> monomer, **2c**)

In a manner similar to that described above, a reaction mixture of **1c** (1.00 g, 4.11 mmol) and acryloyl chloride (1.5 mL, 16.57 mmol) were converted to **2c** as a red solid (0.62 g, 58%). <sup>1</sup>H NMR (400 MHz, DMSO-*d*<sub>6</sub>): δ= 8.42 (d, *J*= 8.7 Hz, 2H), 8.07-8.01 (m, 4H), 7.46 (d, *J*= 8.7 Hz, 2H), 6.60-6.56 (m, 1H), 6.47-6.40 (m, 1H), 6.20-6.18 (m, 1H). <sup>13</sup>C NMR (100 MHz, DMSO-*d*<sub>6</sub>): δ= 164.28, 155.46, 153.87, 150.00, 148.96, 134.75, 127.80, 125.55, 124.99, 123.98, 123.55. HRMS (ESI<sup>+</sup>) *m/z* for C<sub>15</sub>H<sub>12</sub>N<sub>3</sub>O<sub>4</sub> [M+H]<sup>+</sup>, calcd 296.0909, found 296.0908.

### Biocompatibility of ABOMe, ABH, and ABNO<sub>2</sub> ionic hydrogels

The biocompatibility of ABOMe, ABH, and ABNO<sub>2</sub> ionic hydrogels was assessed by culturing L929 cells with an extraction medium.<sup>S1</sup> This medium was prepared by immersing the hydrogels in Dulbecco's Modified Eagle Medium (DMEM, Gibco, Life Technologies, Carlsbad, CA, USA) at a 1:10 volume ratio (hydrogel to medium) and incubating at 37 °C for two days. L929 cells were seeded in 96-well plates and cultured with DMEM at 37 °C under 5% CO<sub>2</sub> for one day. The DMEM was then replaced with the extraction medium, and the cells were allowed to grow for one, three, and five days. Cell viability assays were performed using the MTT reagent, and the optical density (OD) of the resulting solution was measured at 595 nm with a BioTek 800 TS microplate reader (Winooski, VT, USA). Cells not exposed to the test hydrogels served as the control group. The cell viability percentage (%) was calculated from the expression  $OD_{\text{sample}}/OD_{\text{control}}$ .

### Porcine skin

Porcine skin tissues were purchased from a local market and stored at -20°C until needed. Before use, the fat was carefully trimmed off with a knife, and the cleaned skin was soaked in water and kept at 4°C.

Table S1. Formulations of azobenzene-based hydrogels.<sup>a</sup>

| Hydrogel                         | AAM <sup>b</sup> | DF-PEG <sup>b</sup> | MAPTAC <sup>b</sup> | ABOMe <sup>b</sup> | ABH <sup>b</sup> | ABNO <sub>2</sub> <sup>b</sup> |
|----------------------------------|------------------|---------------------|---------------------|--------------------|------------------|--------------------------------|
| ABOMe hydrogel                   | 45               | 2                   | /                   | 1                  | /                | /                              |
| ABH hydrogel                     | 45               | 2                   | /                   | /                  | 1                | /                              |
| ABNO <sub>2</sub> hydrogel       | 45               | 2                   | /                   | /                  | /                | 1                              |
| ABOMe ionic hydrogel             | 45               | 2                   | 2                   | 1                  | /                | /                              |
| ABH ionic hydrogel               | 45               | 2                   | 2                   | /                  | 1                | /                              |
| ABNO <sub>2</sub> ionic hydrogel | 45               | 2                   | 2                   | /                  | /                | 1                              |

<sup>a</sup>2,2'-azobisisobutyronitrile (AIBN, 0.4 %w/v), acrylamide is AAM, dialde-hyde-functionalized poly(ethylene glycol) is DF-PEG, and [3-(methacryloylamino)propyl]-trimethylammonium chloride is MAPTAC. <sup>b</sup>unit: %w/v

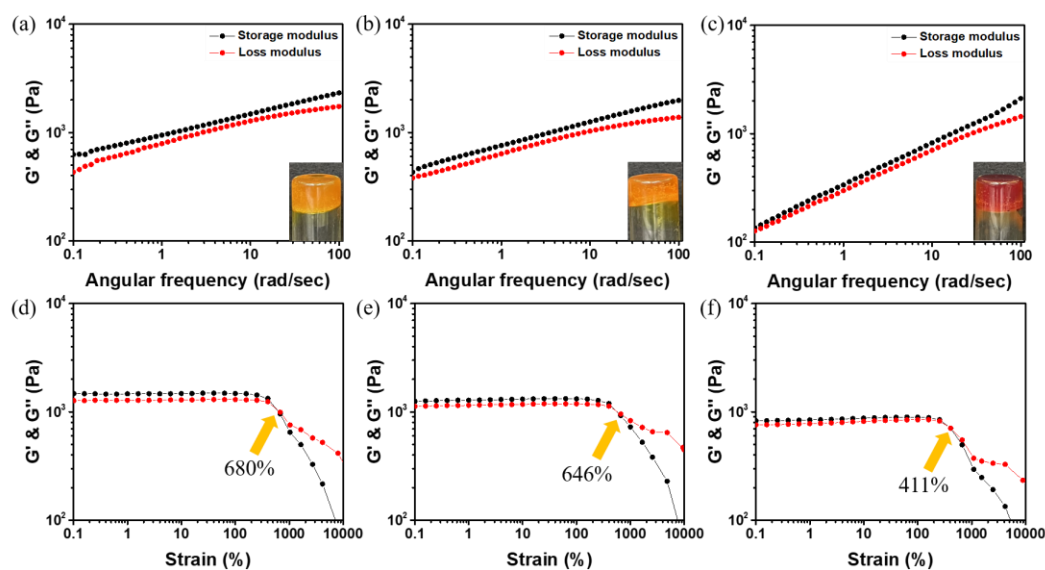

Fig. S1. Frequency dependent ( $\omega = 0.1-100$  rad/sec) of rheology measurement of (a) ABOMe hydrogel, (b) ABH hydrogel, and (c) ABNO<sub>2</sub> hydrogel. Inset: Optical images of the corresponding hydrogels. Strain dependent of  $G'$  (black) and  $G''$  (red) of (d) ABOMe hydrogel, (e) ABH hydrogel, and (f) ABNO<sub>2</sub> hydrogel.

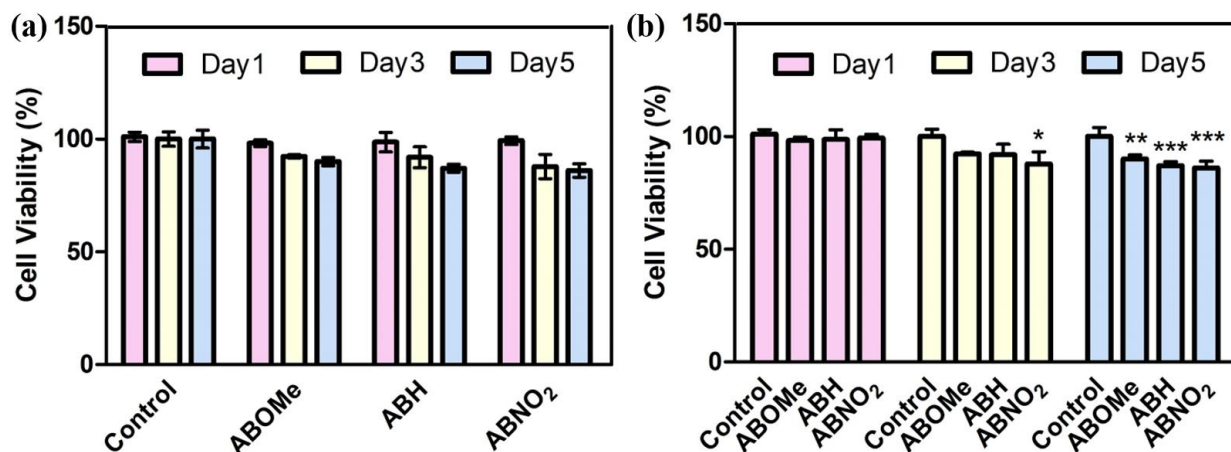

Fig. S2. Cell viability of L929 cells on ABOMe, ABH, and ABNO<sub>2</sub> ionic hydrogels for 1, 3, and 5 days. Statistical significance is indicated by \*, \*\*, or \*\*\*, representing  $p < 0.05$ ,  $p < 0.01$ , and  $p < 0.001$ , respectively.

Note: The samples exhibited high cell viability, significantly exceeding the ISO standard for material cytotoxicity (70%).<sup>S1,S2</sup>

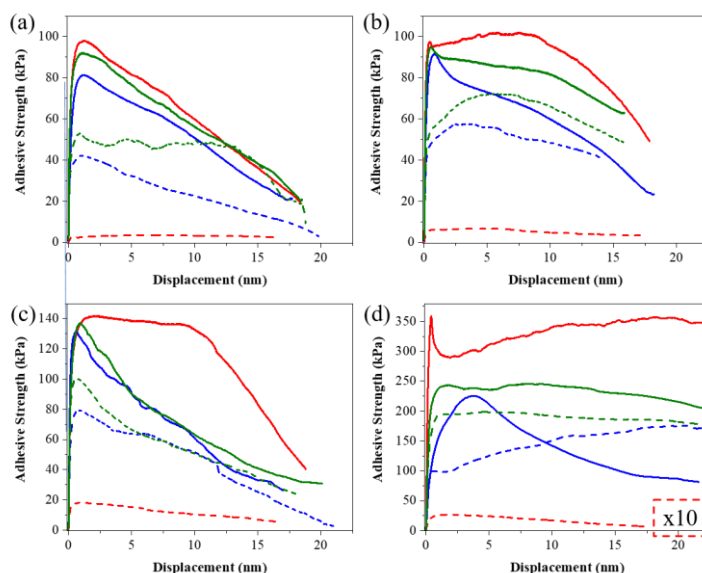

Fig. S3. Lap-shear strength tests for the adhesive strength of ABOMe (red), ABH (blue), and ABNO<sub>2</sub> (green) ionic hydrogels on (a) glass, (b) Al, (c) PVC, and (d) porcine skin before (solid line) and after (dashed line) UV light irradiation.

Table S2. Summary of lap-shear strength tests for the adhesive strength of ABOMe, ABH, and ABNO<sub>2</sub> ionic hydrogels on glass, Al, PVC, and porcine skin before and after UV light irradiation.

| Substrate    | ABOMe     |          | ABH       |           | ABNO <sub>2</sub> |           |
|--------------|-----------|----------|-----------|-----------|-------------------|-----------|
|              | before    | after    | before    | after     | before            | after     |
| Glass        | 97.2 kPa  | 2.6 kPa  | 81.0 kPa  | 41.8 kPa  | 91.7 kPa          | 52.9 kPa  |
| Aluminum     | 97.5 kPa  | 6.5 kPa  | 91.5 kPa  | 57.4 kPa  | 94.8 kPa          | 66.2 kPa  |
| PVC          | 141.6 kPa | 18.2 kPa | 131.2 kPa | 78.9 kPa  | 136.9 kPa         | 99.6 kPa  |
| Porcine skin | 360.7 kPa | 2.5 kPa  | 222.6 kPa | 100.1 kPa | 241.6 kPa         | 193.9 kPa |

Table S3 Comparison of reported adhesive strength values of hydrogels on porcine skin.

| Component                          | Maximum of adhesive strength (kPa) | Reference |
|------------------------------------|------------------------------------|-----------|
| PDA-PAM/Mg <sup>2+</sup> hydrogel  | 3.69 kPa                           | S3        |
| 0.05 NPs-P-PAA hydrogel            | 27.5 kPa                           | S4        |
| BG/OSA hydrogel                    | 55 kPa                             | S5        |
| PDA-PAM hydrogel                   | 15.2 kPa                           | S6        |
| PAM-PEI hydrogel (PEI: PAM = 1: 9) | 7 kPa                              | S7        |
| PT-DA/PAA hydrogel                 | 65 kPa                             | S8        |
| HA-PEG hydrogel                    | 30.3 kPa                           | S9        |
| PAASP-40% hydrogel                 | 120 kPa                            | S10       |
| This work                          | 360.7 kPa                          | /         |



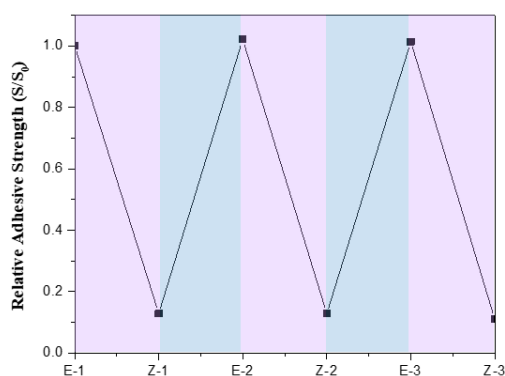

Fig. S4. Multicycle experiments monitoring the adhesive strength change of ABOMe ionic hydrogel under UV and visible light irradiation.  $S_0$ : original adhesive strength;  $S$ : adhesive strength after irradiation (purple background indicates UV light irradiation; blue background indicates visible light irradiation)

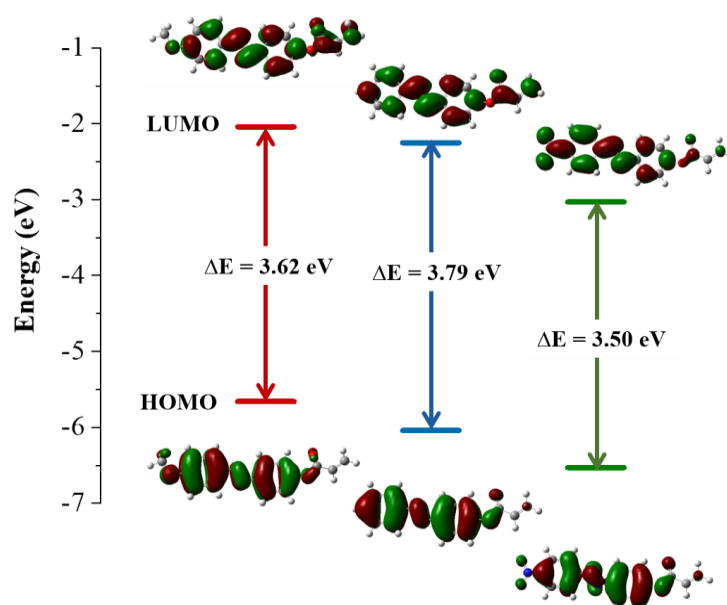

Fig. S5. Molecular orbital amplitude plots of HOMO and LUMO energy levels of (*E*)-ABOMe, (*E*)-ABH, and (*E*)-ABNO<sub>2</sub>, calculated by using DFT at the B3LYP/6-31G(d) level.

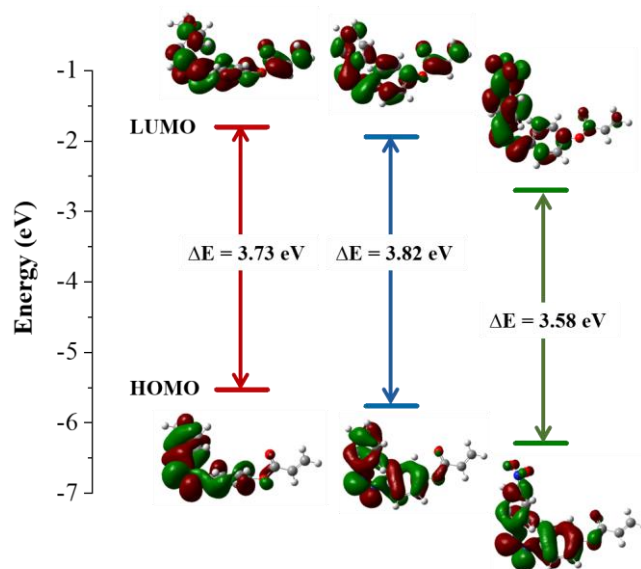

Fig. S6. Molecular orbital amplitude plots of HOMO and LUMO energy levels of (Z)-ABOME, (Z)-ABH, and (Z)-ABNO<sub>2</sub>, calculated by using DFT at the B3LYP/6-31G(d) level.

Table S4. Summarized the bond lengths (R), bond angles (A), and dihedral angles (D) of the *E* and *Z* isomers and the transition state (TS) of ABOMe, ABH, and ABNO<sub>2</sub>, as determined using DFT at the B3LYP/6-31G(d) level.

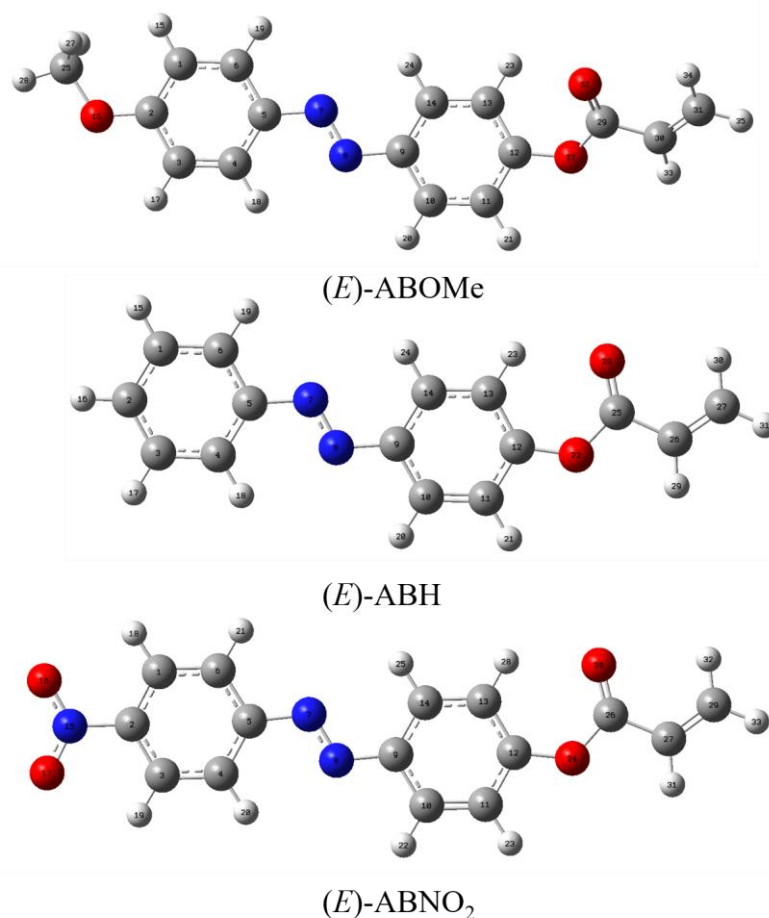

|                        | R (N7-N8) | A (C5-N7-N8) | D (C5-N7-N8-C9) |
|------------------------|-----------|--------------|-----------------|
| (E)-ABOMe              | 1.26360   | 115.05541    | 180.00002       |
| (TS)-ABOMe             | 1.29210   | 123.99044    | 90.00806        |
| (Z)-ABOMe              | 1.25108   | 124.76953    | 0.00538         |
| (E)-ABH                | 1.26152   | 114.81494    | 179.93754       |
| (TS)-ABH               | 1.22852   | 179.99985    | 89.06010        |
| (Z)-ABH                | 1.24898   | 124.11442    | 0.06076         |
| (E)-ABNO <sub>2</sub>  | 1.26260   | 114.30772    | 178.96872       |
| (TS)-ABNO <sub>2</sub> | 1.22596   | 179.90729    | 87.06676        |
| (Z)-ABNO <sub>2</sub>  | 1.24823   | 124.69824    | 0.00028         |

R: bond length in Å, A: bond angle in degrees, D: dihedral angle in degrees, E: energy in kcal/mol  
 Carbon, hydrogen, nitrogen, and oxygen atoms are depicted in gray, white, blue, and red, respectively.

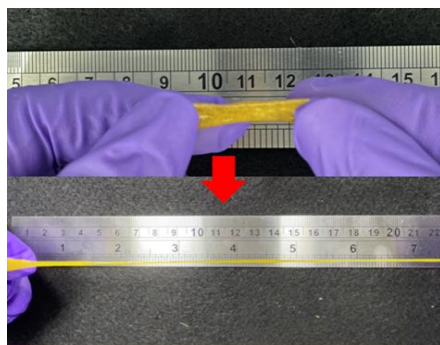

Fig. S7. The stretchability of the healed hydrogel.

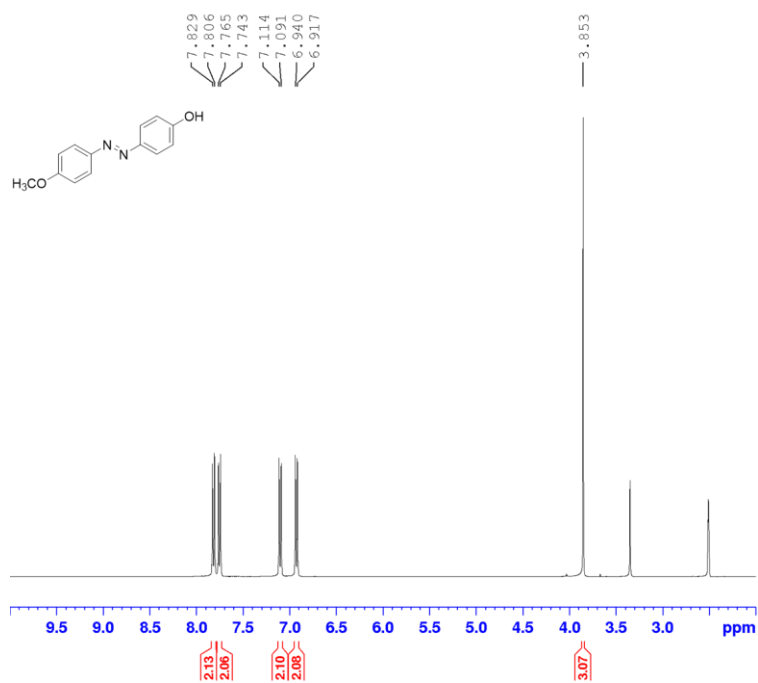

Fig. S8. <sup>1</sup>H NMR spectrum of compound **1a** in DMSO-*d*<sub>6</sub>.

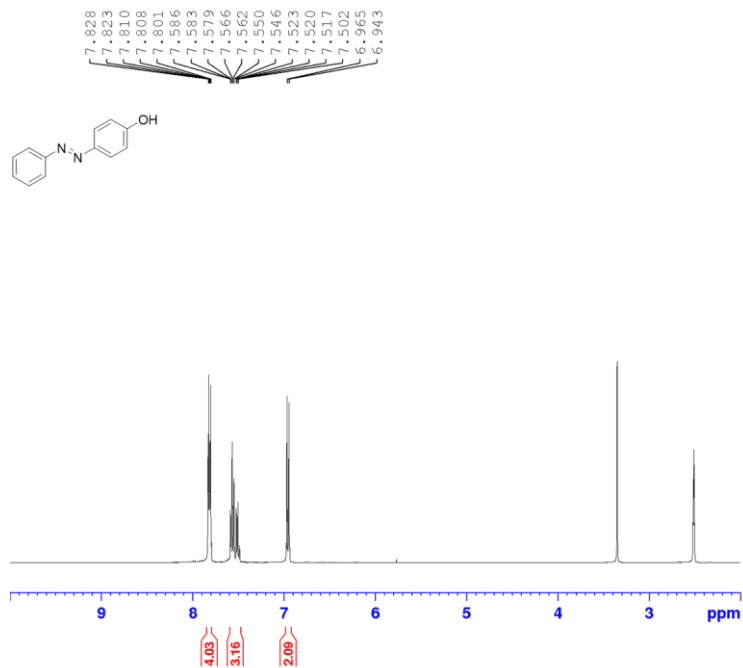

Fig. S9. <sup>1</sup>H NMR spectrum of compound **1b** in CDCl<sub>3</sub>.

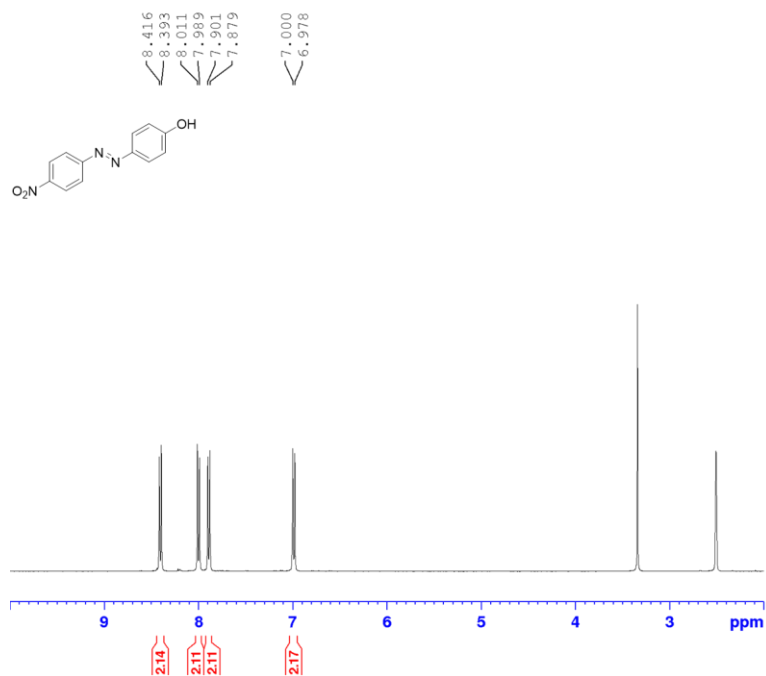

Fig. S10. <sup>1</sup>H NMR spectrum of compound **1c** in DMSO-*d*<sub>6</sub>.

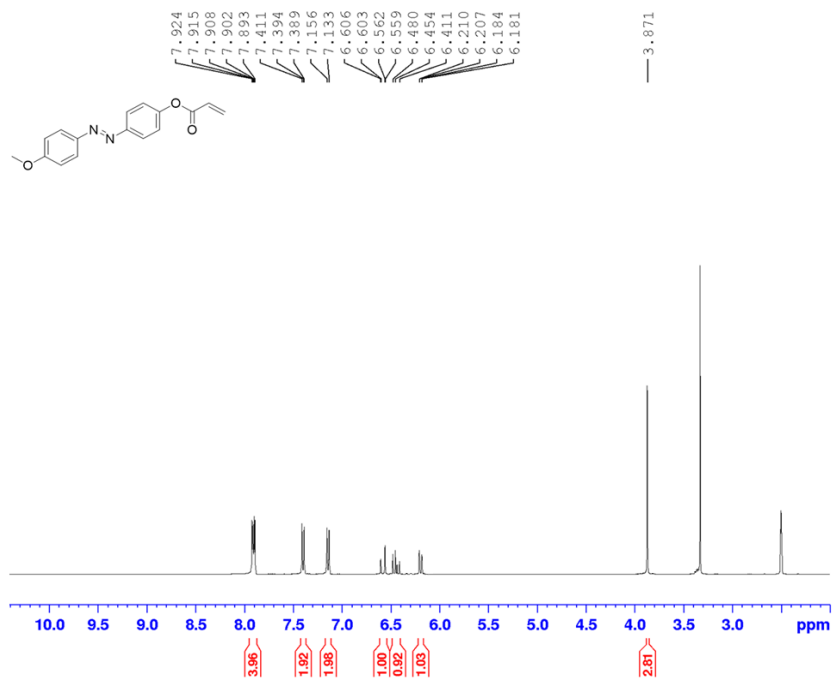

Fig. S11. <sup>1</sup>H NMR spectrum of ABOMe (**2a**) in DMSO-*d*<sub>6</sub>.

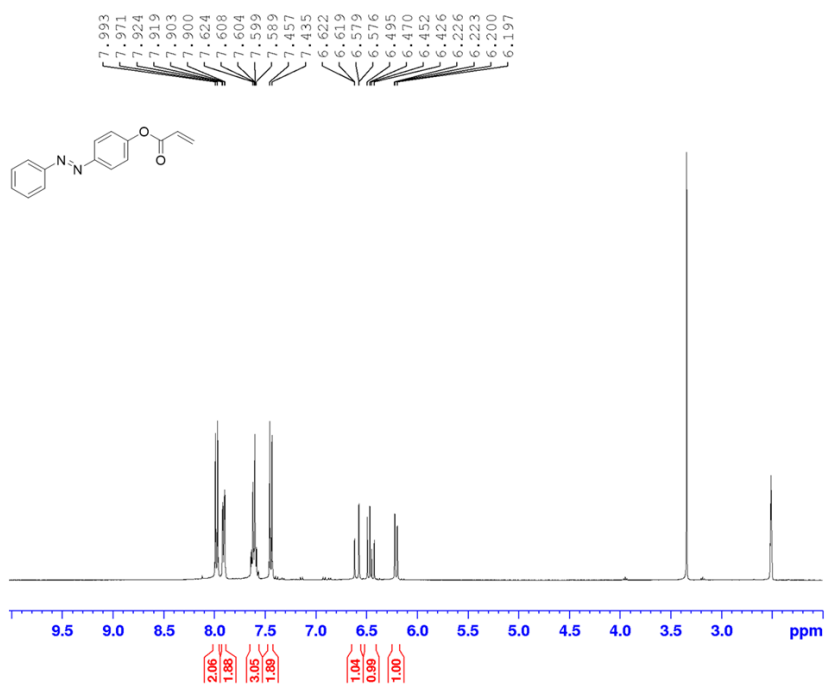

Fig. S12. <sup>1</sup>H NMR spectrum of ABH (**2b**) in DMSO-*d*<sub>6</sub>.

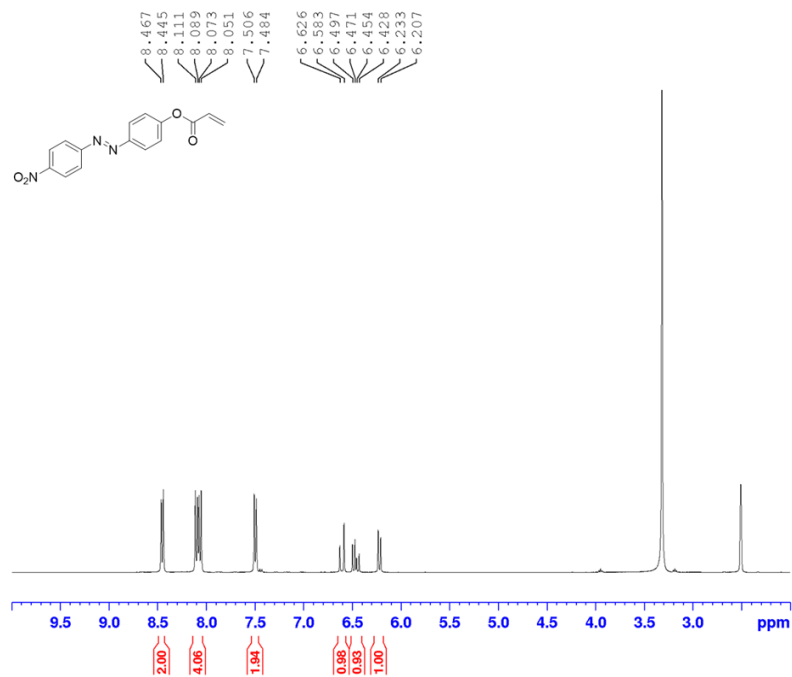

Fig. S13. <sup>1</sup>H NMR spectrum of ABNO<sub>2</sub> (**2c**) in DMSO-*d*<sub>6</sub>.

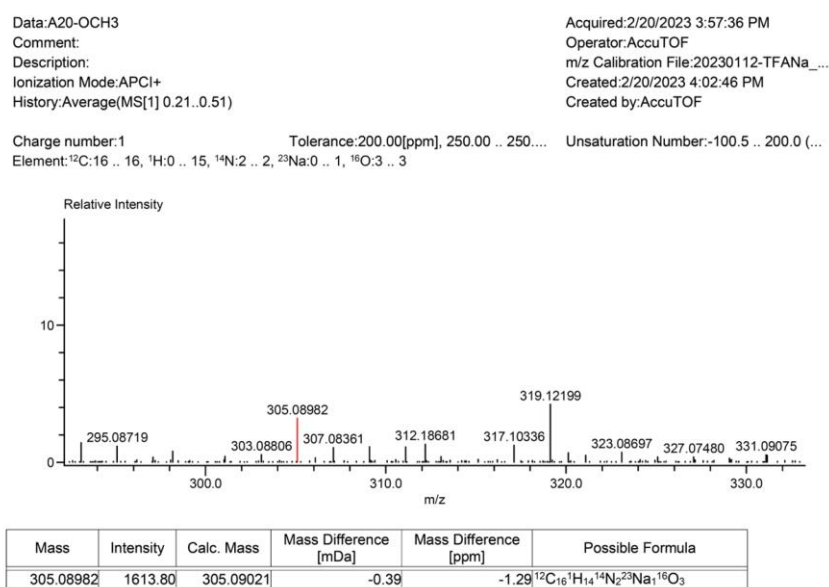

Fig. S14. HRMS spectrum of **2a**.

Data:A20-H  
 Comment:  
 Description:  
 Ionization Mode:APCI+  
 History:Average(MS[1] 0.23..0.28)

Acquired:2/20/2023 3:46:39 PM  
 Operator:AccuTOF  
 m/z Calibration File:20230112-TFANA\_...  
 Created:2/20/2023 3:59:07 PM  
 Created by:AccuTOF

Charge number:1  
 Tolerance:200.00[ppm], 250.00 .. 250.00  
 Unsaturation Number:-100.5 .. 200.0 (...)  
 Element:<sup>12</sup>C:15 .. 15, <sup>1</sup>H:0 .. 13, <sup>14</sup>N:2 .. 2, <sup>23</sup>Na:0 .. 1, <sup>16</sup>O:2 .. 2

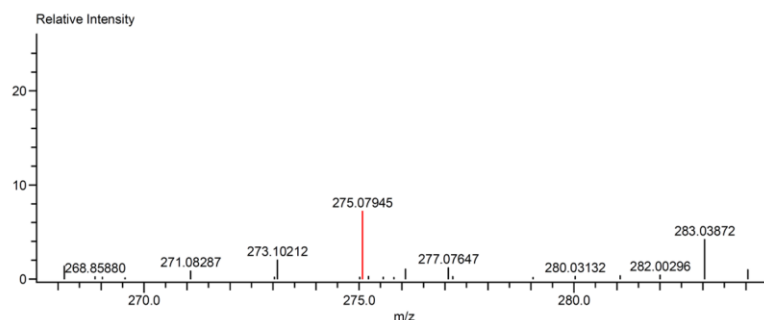

| Mass      | Intensity | Calc. Mass | Mass Difference [mDa] | Mass Difference [ppm] | Possible Formula                                                                                                                      |
|-----------|-----------|------------|-----------------------|-----------------------|---------------------------------------------------------------------------------------------------------------------------------------|
| 275.07945 | 5699.90   | 275.07965  | -0.20                 | -0.71                 | <sup>12</sup> C <sub>15</sub> <sup>1</sup> H <sub>12</sub> <sup>14</sup> N <sub>2</sub> <sup>23</sup> Na <sup>16</sup> O <sub>2</sub> |

Fig. S15. HRMS spectrum of **2b**.

Data:AZO-NO2  
 Comment:  
 Description:  
 Ionization Mode:ESI+  
 History:Average(MS[1] 0.18..0.22)

Acquired:6/20/2024 2:41:03 PM  
 Operator:AccuTOF  
 m/z Calibration File:20240515-TFANA\_...  
 Created:6/20/2024 4:07:50 PM  
 Created by:AccuTOF

Charge number:1  
 Tolerance:500.00[ppm], 500.00 .. 500.00  
 Unsaturation Number:-50.5 .. 50.0 (Fra...)  
 Element:<sup>12</sup>C:15 .. 15, <sup>1</sup>H:0 .. 13, <sup>14</sup>N:4 .. 4, <sup>23</sup>Na:0 .. 3, <sup>16</sup>O:3 .. 3

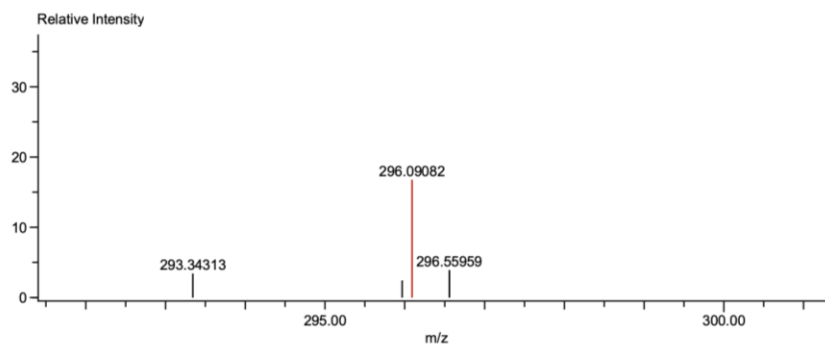

| Mass      | Intensity | Calc. Mass | Mass Difference [mDa] | Mass Difference [ppm] | Possible Formula                                                                                                     |
|-----------|-----------|------------|-----------------------|-----------------------|----------------------------------------------------------------------------------------------------------------------|
| 296.09082 | 614.73    | 296.09094  | -0.12                 | -0.40                 | <sup>12</sup> C <sub>15</sub> <sup>1</sup> H <sub>12</sub> <sup>14</sup> N <sub>4</sub> <sup>16</sup> O <sub>3</sub> |

Fig. S16. HRMS spectrum of **2c**.



## Reference

- S1. ISO 10993-5: 2009 Biological Evaluation of Medical Devices-Part 5: Tests for in Vitro Cytotoxicity (International Organization for Standardization, 2009).
- S2. S. Prasad, M. Gupta and R. Wong, *Sci. Rep.*, 2022, **12**, 8259.
- S3. Z. Guo, Z. Zhang, N. Zhang, W. Gao, J. Li, Y. Pu, B. He and J. Xie, *Bioact. Mater.*, 2022, **15**, 203-213.
- S4. D. Gan, W. Xing, L. Jiang, J. Fang, C. Zhao, F. Ren, L. Fang, K. Wang and X. Lu, *Nat. Commun.*, 2019, **10**, 1487.
- S5. L. Gao, Y. Zhou, J. Peng, C. Xu, Q. Xu, M. Xing and J. Chang, *NPG Asia Mater.*, 2019, **11**, 66.
- S6. L. Han, L. Yan, K. Wang, L. Fang, H. Zhang, Y. Tang, Y. Ding, L.-T. Weng, J. Xu, J. Weng, Y. Liu, F. Ren and X. Lu, *NPG Asia Mater.*, 2017, **9**, e372.
- S7. Y. Yan, S. Xu, H. Liu, X. Cui, J. Shao, P. Yao, J. Huang, X. Qiu and C. Huang, *Colloids Surf. A*, 2020, **593**, 1246.
- S8. S. Kindaveeti, G. Choi, S. C. Veerla, S. Kim, H. J. Lee, U. Kuzhiumparambil, P. J. Ralph, J. Yeo and H. E. Jeong, *Nano Converg.*, 2024, **11**, 12.
- S9. H. Ren, Z. Zhang, X. Cheng, Z. Zou, X. Chen and C. He, *Sci. Adv.*, 2023, **9**, 4327.
- S10. J. Yu, Y. Qin, Y. Yang, X. Zhao, Z. Zhang, Q. Zhang, Y. Su, Y. Zhang and Y. Cheng, *Bioact. Mater.*, 2023, **19**, 703-716.
